# Supplementary material
Source: MDPI journal article supplement (https://www.mdpi.com/2079-8954/5/2/33)
Supplement: s1 [file s1]

**Supplementary Materials: Developing a Framework for Traceability Implementation in Textile Supply Chain**

Vijay Kumar 1,2,3,4,*, Carina Hallqvist 1 and Daniel Ekwall 1,5

1 University of Borås, Allégatan 1, 503 32 Borås, Sweden; carina.hallqvist@hb.se (C.H.); daniel.ekwall@hb.se (D.E.)

2 ENSAIT/GEMTEX, 2 Allée Louise et Victor Champier, 59100 Roubaix, France

3 Université Lille 1 Sciences et Technologies, Cité Scientifique, 59655 Villeneuve-d’Ascq, France

4 College of Textile and Clothing Engineering, Soochow University, Suzhou 215006, China

5 Hanken School of Economics, Arkadiankatu 22, 00100 Helsinki, Finland

***** Correspondence: vijay.kumar@hb.se; Tel.: +46-33-435-45-72

(Supplementary data)


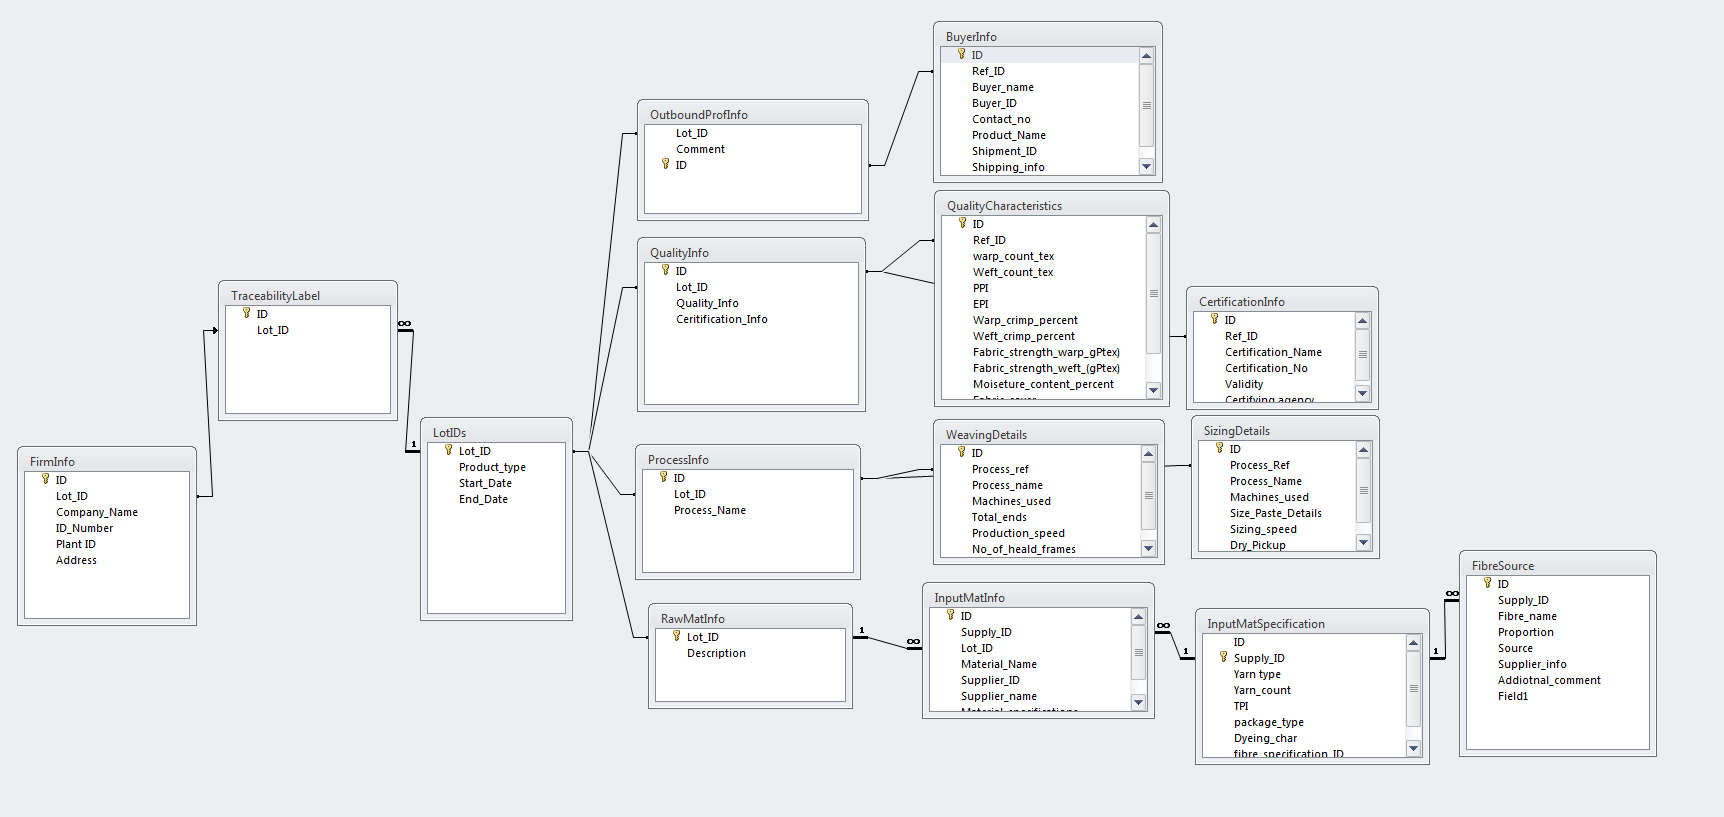


**Figure S1.** RDBMS view for data management at the weaver used in the illustrated example.


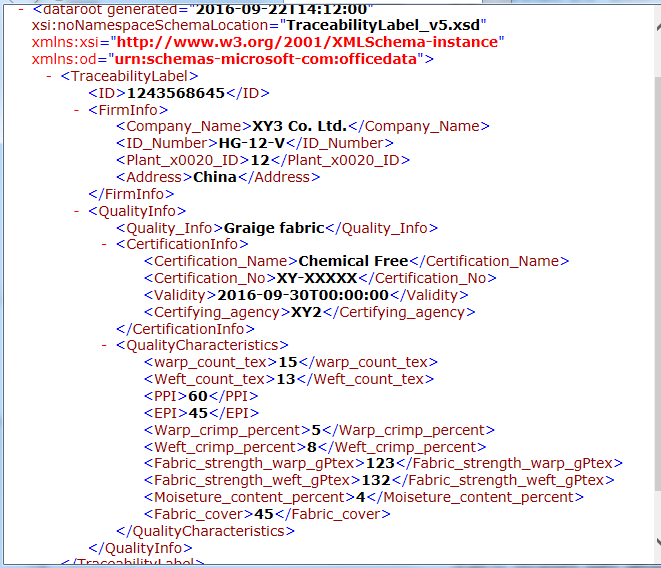


Figure S2. Traceability data exchange between the weaver and downstream buyer.
